# Supplementary material
Source: PubMed Central journal article supplement (PMC4348791)
Supplement: supp_pp.114.256552_256552revsupplemental_Fig_S4.pdf [file supp_pp.114.256552_256552revsupplemental_Fig_S4.pdf]

## Supplemental Figure S4

**A**

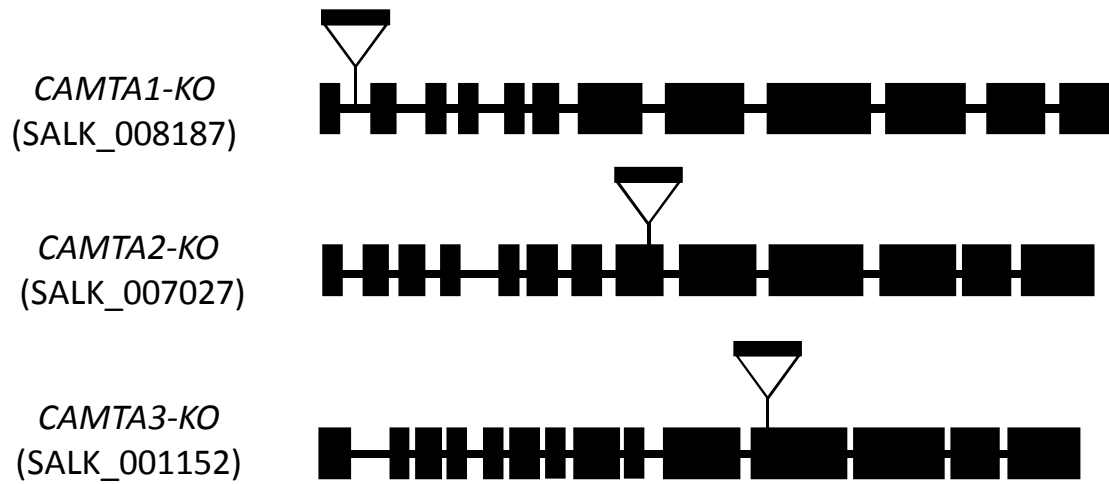

**B**

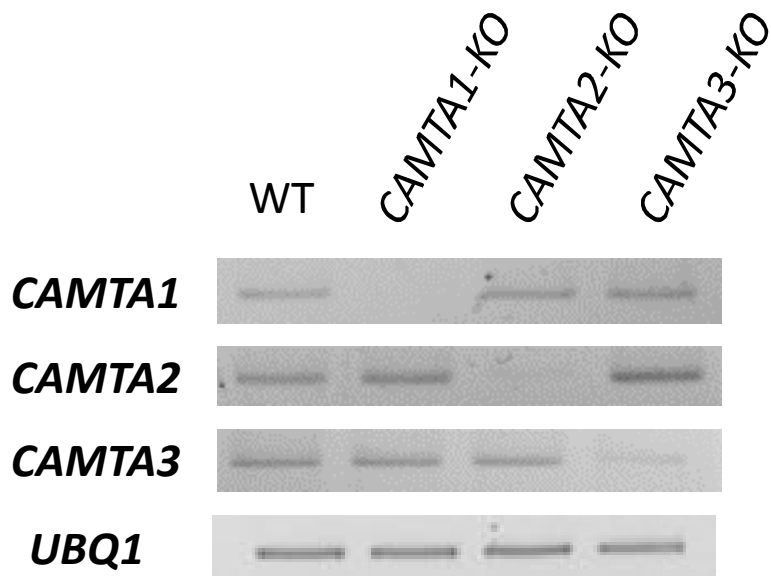

Supplemental Figure S4. Position of T-DNA insertion in the knockout lines of *CAMTAs* and expression levels of *CAMTAs* in the mutants. Panel A shows position of T-DNA insertion, while the panel B shows the gel image of RT-PCR.
