# Supplementary material
Source: PubMed Central journal article supplement (PMC4348791)
Supplement: supp_pp.114.256552_256552supplemental_Fig_S1.pdf [file supp_pp.114.256552_256552supplemental_Fig_S1.pdf]

## Supplemental Figure S1

*AtALMT1* Promoter

```

2658550 aaggggaggg cttaactagt gcccaactta ctgggctagg ttcgactccg tttttttatt
                                         TSS3(-185) *
2658600 acattttcct tttccatttc ttttaagactt taaccctgaa atctcgaagt gcaacgcacc
                                         TSS2(-138) *
                                         TATA
2658650 actaatTTTT tataatatt aacataacat ttcatgagtc ctaaacaaga gtctctcttg
                                         TATA
                                         TSS1(-84) ** *
2658700 gtcttttataa atacatcgat ccatgtacat aaaacaaca agtcatcttt tctttctatc

2658750 tgaaagtaat cagagaaatca gaaaacactt gagagagctg agtgaccatc aaaaggtggt

2658800 ATGGAGAAAG TGAGAGAGAT AGTGAGAGAA GGGATTAGAG TAGGGAAT...
          M E K V R E I V R E G I R V G N
  
```

|                                             | Position from ATG | 5'End Sequence | Number of transcripts |     |
|---------------------------------------------|-------------------|----------------|-----------------------|-----|
|                                             | -84               | AACAAGTCAT...  | 17                    |     |
| TSS1                                        | -83               | ACAAGTCATC...  | 5                     | /34 |
|                                             | -81               | AAGTCATCTT...  | 12                    |     |
| <hr style="border-top: 1px dashed black;"/> |                   |                |                       |     |
| TSS2                                        | -138              | AAACAAGAGT...  | 21                    | /21 |
| <hr style="border-top: 1px dashed black;"/> |                   |                |                       |     |
| TSS3                                        | -185              | GCACCACTAA...  | 6                     | /6  |

Supplemental Figure S1. The 5' end of *AtALMT1* transcripts determined by 5' RACE. 5' RACE analyses were performed RNA samples isolated from AI treated roots. Asterisks indicate 5' ends of transcripts and were categorized as TSS1, 2 and 3. Number of transcripts were shown below the sequence.
