# Supplementary material
Source: PubMed Central journal article supplement (PMC4348791)
Supplement: supp_pp.114.256552_256552supplemental_Fig_S2.pdf [file supp_pp.114.256552_256552supplemental_Fig_S2.pdf]

## Supplemental Figure S2

**A**

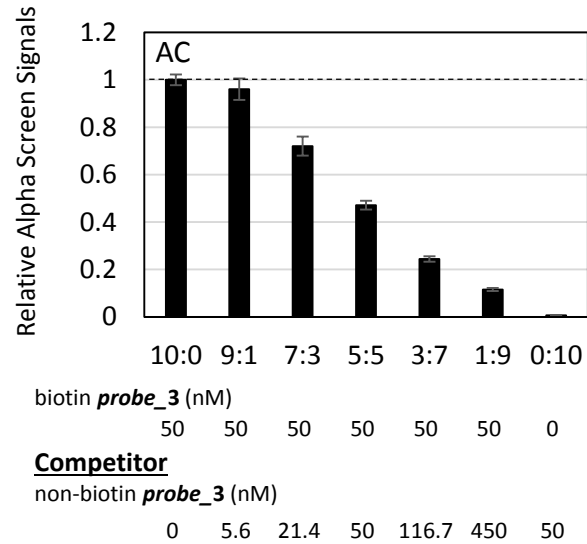

**B**

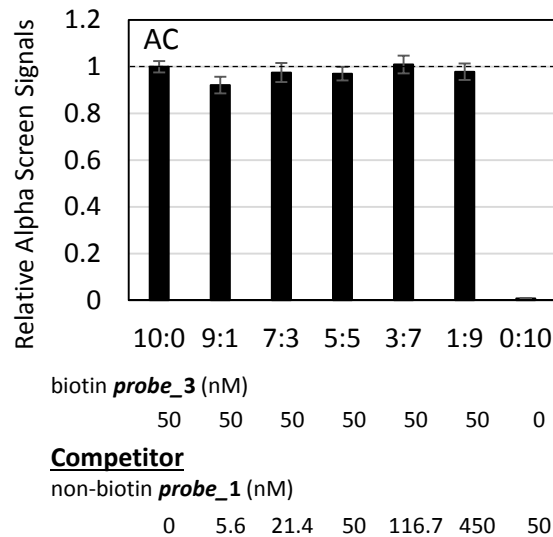

Supplemental Figure S2. *In vitro* binding assay of STOP1 protein to the dsDNA probe 3 containing putative STOP1 binding sites of *AtALMT1* promoter. Competitive binding assay of biotinylated probe 3 in the presence of non-labeled probe 3 (A) or probe 1 (negative control) (B). Values are the mean  $\pm$  SD ( $n = 3$ ).
