# Supplementary material
Source: PubMed Central journal article supplement (PMC4348791)
Supplement: supp_pp.114.256552_256552supplemental_Fig_S3.pdf [file supp_pp.114.256552_256552supplemental_Fig_S3.pdf]

## Supplemental Figure S3

**A**

|                |                                         |
|----------------|-----------------------------------------|
| <b>probe_3</b> | CTCCAATTAAGGGGAGGGCTTAACTAGTGC          |
| <i>M</i> 1-6   | <b>tcttgg</b> TTAAGGGGAGGGCTTAACTAGTGC  |
| <i>M</i> 7-12  | CTCCA <b>accgga</b> aGGAGGGCTTAACTAGTGC |
| <i>M</i> 13-18 | CTCCAATTAAG <b>Gaagaaa</b> CTTAACTAGTGC |
| <i>M</i> 19-24 | CTCCAATTAAGGGGAGGG <b>tccggt</b> TAGTGC |
| <i>M</i> 25-30 | CTCCAATTAAGGGGAGGGCTTAA <b>Ccgacat</b>  |

**B**

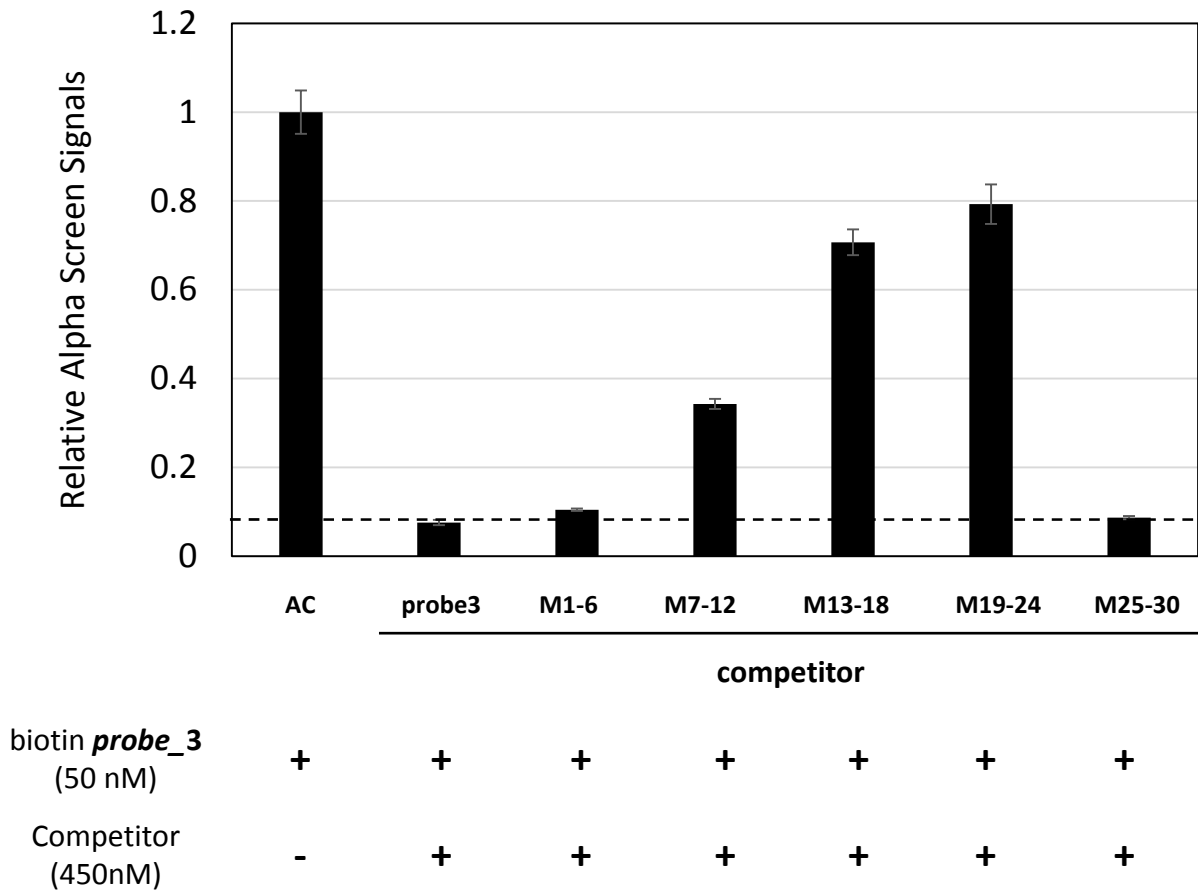

Supplemental Figure S3. *In vitro* binding assay of STOP1 protein to the mutated dsDNA probe 3 (see Fig 5). Relative alpha screen signals of STOP1 protein to the biotinylated probe3 with absence (AC) or presence of non-biotinylated mutated dsDNA in panel A are shown in the panel B. Values  $\pm$  SD are shown ( $n = 3$ ).
