# Supplementary material
Source: PubMed Central journal article supplement (PMC4348791)
Supplement: supp_pp.114.256552_256552supplemental_Table_S1.pdf [file supp_pp.114.256552_256552supplemental_Table_S1.pdf]

Supplemental Table S1. List of overrepresented octamer units in the *AtALMT1* promoter based on the relative appearance rate calculated from microarray datasets.

| Position | Octamer  | RAR  |      |       | P-value |       |       | Motif* | Predicted <i>Cis</i> region |
|----------|----------|------|------|-------|---------|-------|-------|--------|-----------------------------|
|          |          | 6h   | 24h  | stop1 | 6h      | 24h   | stop1 |        |                             |
| -526     | GAGGGCAC | 2.88 | 2.41 | 7.71  | 0.299   | 0.346 | 0.008 |        |                             |
| -525     | AGGGCACT | 1.68 | 2.8  | 2.99  | 0.453   | 0.166 | 0.15  |        | A                           |
| -524     | GGGCACTA | 2.34 | 3.91 | 2.09  | 0.353   | 0.099 | 0.386 |        |                             |
| -361     | TCCTACCG | 2.08 | 1.74 | 3.71  | 0.387   | 0.443 | 0.107 | Hbox   | B                           |
| -360     | CCTACCGG | 3.88 | 3.24 | 6.91  | 0.234   | 0.273 | 0.038 |        |                             |
| -320     | CCTCACGC | 4.54 | 2.84 | 1.01  | 0.014   | 0.095 | 0.63  |        |                             |
| -319     | CTCACGCG | 3.31 | 2.07 | 0.74  | 0.037   | 0.184 | 0.608 | CGCG   |                             |
| -318     | TCACGCGT | 2.04 | 1.71 | 0.91  | 0.261   | 0.332 | 0.7   | CGCG   |                             |
| -317     | CACGCGTC | 0.91 | 0.76 | 0.81  | 0.701   | 0.624 | 0.653 | CGCG   | C                           |
| -316     | ACGCGTCG | 1.56 | 2.61 | 1.39  | 0.477   | 0.185 | 0.516 | CGCG   |                             |
| -315     | CGCGTCGC | 2.88 | 2.41 | 5.14  | 0.299   | 0.346 | 0.063 | CGCG   |                             |
| -314     | GCGTCGCT | 2.5  | 2.08 | 4.45  | 0.336   | 0.387 | 0.079 |        |                             |
| -313     | CGTCGCTC | 3.46 | 2.89 | 1.54  | 0.119   | 0.159 | 0.482 |        |                             |
| -301     | TAAGGGGA | 2.68 | 3.72 | 1.59  | 0.108   | 0.013 | 0.363 |        |                             |
| -300     | AAGGGGAG | 1.01 | 1.69 | 0.9   | 0.63    | 0.336 | 0.697 |        |                             |
| -299     | AGGGGAGG | 1.14 | 0.95 | 2.02  | 0.588   | 0.716 | 0.265 |        | D                           |
| -298     | GGGGAGGG | 3.69 | 1.54 | 4.93  | 0.108   | 0.483 | 0.026 |        |                             |
| -297     | GGGAGGGC | 3.63 | 3.03 | 3.23  | 0.248   | 0.288 | 0.273 |        |                             |
| -285     | CTAGTGCC | 4.62 | 1.29 | 2.75  | 0.031   | 0.545 | 0.171 |        |                             |
| -284     | TAGTGCCC | 1.94 | 1.62 | 8.64  | 0.408   | 0.466 | 0     |        | E                           |
| -283     | AGTGCCCA | 2.47 | 2.06 | 4.41  | 0.2     | 0.259 | 0.015 | GCCCA  |                             |
| -282     | GTGCCCAA | 4.93 | 3.29 | 1.76  | 0.004   | 0.038 | 0.32  | GCCCA  |                             |
| -270     | CTGGGCTA | 4.27 | 2.38 | 1.27  | 0.037   | 0.212 | 0.549 | GCCCA  |                             |
| -269     | TGGGCTAG | 0.74 | 1.85 | 0.66  | 0.609   | 0.227 | 0.554 | GCCCA  |                             |
| -268     | GGGCTAGG | 1.65 | 1.38 | 1.47  | 0.458   | 0.52  | 0.497 |        |                             |
| -267     | GGCTAGGT | 3.46 | 2.89 | 4.63  | 0.119   | 0.159 | 0.031 |        | F                           |
| -266     | GCTAGGTT | 0.73 | 1.22 | 1.95  | 0.603   | 0.492 | 0.205 |        |                             |
| -265     | CTAGGTTC | 3.41 | 0.71 | 2.28  | 0.034   | 0.591 | 0.152 |        |                             |
| -264     | TAGGTTCG | 1.68 | 1.4  | 3.74  | 0.339   | 0.422 | 0.013 |        |                             |
| -263     | AGGTTCGA | 1.01 | 0.84 | 3.15  | 0.592   | 0.577 | 0.009 |        |                             |
| -257     | GACTCCGT | 1.44 | 3.61 | 2.57  | 0.504   | 0.055 | 0.189 |        | G                           |
| -210     | TAACCCTG | 2.37 | 1.98 | 3.16  | 0.212   | 0.274 | 0.075 |        |                             |
| -192     | GTGCAACG | 3.31 | 3.68 | 0.98  | 0.067   | 0.027 | 0.729 |        |                             |
| -191     | TGCAACGC | 2.74 | 2.29 | 1.22  | 0.171   | 0.223 | 0.562 |        | H                           |
| -190     | GCAACGCA | 4.97 | 2.49 | 3.55  | 0.004   | 0.126 | 0.03  |        |                             |

Relative appearance rate in the Al-inducible (fold change >3) and repressed in the stop1 mutant in Al treatment (fold change <2.5) were listed with the RAR values and P value of student's t-test. Red color indicates that the RAR values are above threshold, and the yellow filled columns indicate p<0.05. Predicted cis-regions shown in Fig 5 were also shown.
