# Supplementary material
Source: PubMed Central journal article supplement (PMC4348791)
Supplement: supp_pp.114.256552_256552supplemental_Table_S2.pdf [file supp_pp.114.256552_256552supplemental_Table_S2.pdf]

**Supplemental Table S2. Sequence of mutated probes used for in vitro binding assay of STOP1 protein to the *AtALMT1* promoter region.**

| Mutation  | Sequence                                 |
|-----------|------------------------------------------|
| probe3    | CTCCAATTAAGGGGAGGGCTTAACTA GTGC          |
| M7 (T/C)  | CTCCAA <b>c</b> TAAGGGGAGGGCTTAACTAGTGC  |
| M8 (T/C)  | CTCCAAT <b>c</b> AAGGGGAGGGCTTAACTAGTGC  |
| M9 (A/G)  | CTCCAATT <b>g</b> AGGGGAGGGCTTAACTAGTGC  |
| M10 (A/G) | CTCCAATTA <b>g</b> GGGGAGGGCTTAACTAGTGC  |
| M11 (G/A) | CTCCAATTA <b>a</b> AGGGAGGGCTTAACTAGTGC  |
| M12 (G/A) | CTCCAATTAAG <b>a</b> GGAGGGCTTAACTAGTGC  |
| M13 (G/A) | CTCCAATTAAGG <b>a</b> GAGGGCTTAACTAGTGC  |
| M14 (G/A) | CTCCAATTAAGGG <b>a</b> AGGGCTTAACTAGTGC  |
| M15 (A/G) | CTCCAATTAAGGGG <b>g</b> GGGCTTAACTAGTGC  |
| M16 (G/A) | CTCCAATTAAGGGGA <b>a</b> GGCTTAACTAGTGC  |
| M17 (G/A) | CTCCAATTAAGGGGAG <b>a</b> GCTTAACTAGTGC  |
| M18 (G/A) | CTCCAATTAAGGGGAGG <b>a</b> CTTAACTAGTGC  |
| M19 (C/T) | CTCCAATTAAGGGGAGGG <b>t</b> TTAACTAGTGC  |
| M20 (T/C) | CTCCAATTAAGGGGAGGGC <b>c</b> TAACTAGTGC  |
| M21 (T/C) | CTCCAATTAAGGGGAGGGCT <b>c</b> AACTAGTGC  |
| M22 (A/G) | CTCCAATTAAGGGGAGGGCTT <b>g</b> ACTAGTGC  |
| M23 (A/G) | CTCCAATTAAGGGGAGGGCTTAG <b>g</b> CTAGTGC |
| M24 (C/T) | CTCCAATTAAGGGGAGGGCTTAA <b>t</b> TAGTGC  |
| M25 (T/C) | CTCCAATTAAGGGGAGGGCTTAAC <b>c</b> AGTGC  |
| M26 (A/G) | CTCCAATTAAGGGGAGGGCTTAACT <b>g</b> GTGC  |

Red color indicates mutated nucleotide.
