# Supplementary material
Source: PubMed Central journal article supplement (PMC4348791)
Supplement: supp_pp.114.256552_256552supplemental_Table_S3.pdf [file supp_pp.114.256552_256552supplemental_Table_S3.pdf]

Supplemental Table S3. Fold change (10  $\mu$ M Al/control; pH 5, 24 hours) of *CAMTA* families in Al-treated roots.

| Name          | AGI code  | FC(Al/Control) | Description                                                                      |
|---------------|-----------|----------------|----------------------------------------------------------------------------------|
| <i>CAMTA1</i> | AT5G09410 | 1.27           | ethylene induced calmodulin binding protein                                      |
| <i>CAMTA2</i> | AT5G64220 | 1.93           | Calmodulin-binding transcription activator protein with CG-1 and Ankyrin domains |
| <i>CAMTA3</i> | AT2G22300 | 1.26           | signal responsive 1                                                              |
| <i>CAMTA4</i> | AT1G67310 | 0.95           | Calmodulin-binding transcription activator protein with CG-1 and Ankyrin domains |
| <i>CAMTA5</i> | AT4G16150 | 0.94           | calmodulin binding;transcription regulators                                      |
| <i>CAMTA6</i> | AT3G16940 | 0.90           | calmodulin binding;transcription regulators                                      |
