# Supplementary material
Source: PubMed Central journal article supplement (PMC4348791)
Supplement: supp_pp.114.256552_256552supplemental_Table_S4.pdf [file supp_pp.114.256552_256552supplemental_Table_S4.pdf]

Supplemental Table S4 Sequence information of PCR primers

| PCR category                                                      | Sequence (5' to 3')        |                                 |                                |
|-------------------------------------------------------------------|----------------------------|---------------------------------|--------------------------------|
|                                                                   | Forward primer sequence    | Reverse primer sequence         |                                |
| <i>ALMT1</i> mutation primer                                      | cis <sub>A</sub> Mutation  | GCCCAAGTGTTAAAAAATAATCTTGTCG    | CGACAAGATTATTTTTTTTAACTTGGGC   |
|                                                                   | cis <sub>B</sub> Mutation  | CATGATCAACTAAAAAATTCATCTAAC     | GTTAGATGAATTTTTTTTAGTTGATCATG  |
|                                                                   | cis <sub>C</sub> Mutation  | GCATAAAACAAAAAAGTCGCTCCAA       | TTGGAGCGACTTTTTTTGTTTTATGC     |
|                                                                   | cis <sub>D</sub> Mutation  | CTCCAATTAAGTTTCTTTATTAAGTAGGCC  | GGCACTAGTTAATAAAGAACTTAATTGGAG |
|                                                                   | cis <sub>E</sub> Mutation  | GGGCTTAACTAAAAAAGTTACTGGGC      | GCCCAGTAAGTTTTTTTAGTTAAGCCC    |
|                                                                   | cis <sub>F</sub> Mutation  | TGCCCAACTTAAAAAAGGTTGACTCC      | GGAGTCGAACCTTTTTTTAAGTTGGGCA   |
|                                                                   | cis <sub>G</sub> Mutation  | GGGCTAGGTTCAAAAAAATTTTTATTAC    | GTAATAAAAAATTTTTTTGAACCTAGCCC  |
|                                                                   | cis <sub>H</sub> Mutation  | CTGAAATCTCGAAGAAAAAACCCTAA      | TTAGTGTTTTTTTTCTTCGAGATTTAG    |
| Real-time RT PCR                                                  | <i>GUS</i>                 | GTGTGAGCGTCGCAGAACATT           | CGGAAGCAACGCGTAAACTC           |
|                                                                   | <i>AtALMT1</i> (At1g08430) | TCTTCATGTTTTTCATGGTTGAGTT       | CACAGTTTTACATGACGTTGATAATGAT   |
|                                                                   | <i>AtCAMTA1</i>            | ACGTTGCTACTGGATGCTTGAACA        | TGGTCCGGTTACCCTAACCTC CA       |
|                                                                   | <i>AtCAMTA2</i>            | CACCCAGTGGTTCACTCTTCTC          | TGCCCCGTCTTTTCGGAATA           |
|                                                                   | <i>AtCAMTA3</i>            | CTGGGCCTTAGAACCAACAATAA         | ACCATTTACATCGCGAAAATCA         |
|                                                                   | <i>UBQ1</i> (At3g52590)    | TCGTAAGTACAATCAGGATAAGATG       | CACTGAAACAAGAAAAACAAACCT       |
| Real-time RT PCR for Quantification of <i>AtALMT1</i> transcripts | <i>AtALMT1</i> _TSS1       | AATATTAACATAACATTTTCATGAGTCCTAA | CGGGTCTTCATTCCCTACTCTA         |
|                                                                   | <i>AtALMT1</i> _TSS2       | CATCGATCCATGTACATAAAAAACA       | CGGGTCTTCATTCCCTACTCTA         |
|                                                                   | <i>AtALMT1</i> _TSS3       | CATCTTTTCTTTCTATCTGAAAGTAATCAG  | CGGGTCTTCATTCCCTACTCTA         |
